1  
2  
3  
4  
5  
6  
7  
8  
9  
10  
11  
12  
13  
14  
15  
16  
17  
18  
19  
20  
21  
22  
23  
24  
25

**Variability of EEG electrode positions and their underlying brain regions: visualising gel artifacts from a simultaneous EEG-fMRI dataset**

C. L. Scrivener <sup>1\*</sup>, A. T. Reader <sup>2</sup>

<sup>1</sup>MRC Cognition and Brain Sciences Unit, University of Cambridge, Cambridge, UK

<sup>2</sup>Department of Psychology, Faculty of Natural Sciences, University of Stirling, Stirling, UK

\* Corresponding author: [catriona.scrivener@mrc-cbu.cam.ac.uk](mailto:catriona.scrivener@mrc-cbu.cam.ac.uk), ORCID 0000-0002-9507-5587

26

## Abstract

27 We investigated the between-subject variability of EEG electrode placement from a  
28 simultaneously recorded EEG-fMRI dataset. Neuro-navigation software was used to localise  
29 electrode positions in  $xyz$  and MNI space, made possible by the gel artifacts present in the  
30 structural MRI images. To assess variation in the brain regions directly underneath each  
31 electrode, we used both raw MNI coordinates and labels from the Harvard-Oxford Cortical  
32 atlas. In a sample of 20 participants, the mean standard deviation of electrode placement was  
33 3.94 mm in  $x$ , 5.55 mm in  $y$ , and 7.17 mm in  $z$ , with the largest variation in parietal and occipital  
34 electrodes. In addition, the brain regions covered by electrode pairs was not always consistent;  
35 for example, the mean location of electrode P07 was mapped to BA18, whereas P08 was closer  
36 to BA19. Further, electrode C1 was mapped to the left primary motor cortex, whereas C2 was  
37 closer to right pre-motor cortex. Overall, the results emphasise the variation in electrode  
38 positioning that can be found even in a fixed cap, potentially caused by between-subject  
39 differences in brain morphology. We present a relatively simple method for approximating the  
40 location of electrodes in a simultaneous EEG-fMRI data set with accompanying analysis code,  
41 and suggest that researchers check the regions underlying their EEG ROIs to improve the  
42 generalisability and reliability of their neuroimaging results.

43 *Keywords:* EEG cap, EEG-fMRI, electrode positions, gel artifact, TMS neuro-navigation

## 44 1. Introduction

45 Scalp electroencephalography (EEG) is one of the most frequently used neuroimaging  
46 methods, providing information about changes in electrical potential across the brain with high  
47 temporal resolution. Typical EEG setups measure activity across multiple points on the scalp.  
48 Electrodes are usually placed according to the international 10-20 system for around 21 channel  
49 recordings, 10-10 for between 64 and 85 channels, or 10-5 for high-density caps of more than  
50 300 channels (Oostenveld et al., 2001; Jurak et al., 2007). These values refer to the distances  
51 between electrodes in relation to the total cap size (i.e., 20% of the total distance from theinion  
52 to the nasion) and aim to provide consistency across experiments. Electrodes are placed on the  
53 head of the participant with reference to anatomical landmarks such as theinion, nasion, and  
54 left and right pre-auricular points, such that the central electrode Cz is approximately aligned  
55 with the vertex. Given careful placement of the electrode cap during experimental setup,  
56 experimenters assume that the electrode placement will be roughly consistent across  
57 participants. Further, when selecting a subset of electrodes for use in EEG analysis, we assume  
58 that they are in a similar position across subjects and that we are comparing activation from  
59 similar regions of the brain.

60 Several studies have investigated electrode placement variations in the 10-20  
61 (Steinmetz et al., 1989; Jack et al., 1990; Homan et al., 1997; Towle et al., 1993; Lagerlund et  
62 al., 1993; Khosla et al., 1999; Okamoto et al., 2004; Herwig et al., 2003; Atcherson et al., 2007)  
63 and 10-10 (Koessler et al., 2009) systems. For example, Okamoto et al. (2004) recorded the  
64 normalised MNI and Talairach coordinates of electrode positions across 17 participants. From  
65 the 10-20 electrode layout used, Fp1 and Fp2 had the smallest deviation of around 5 mm in  
66 their MNI coordinates (reported across the  $x$ ,  $y$ , and  $z$  dimensions), compared to the largest  
67 variation of roughly 10 mm identified in occipital electrodes O1 and O2. Each electrode  
68 position was also projected onto the cortical surface to provide an estimate of the underlying  
69 brain region. Using the mean location across all participants, the electrodes largely conformed  
70 to their intended positioning; for example, P3 and P4 projected to the superior parietal lobule  
71 and precuneus, and O1 and O2 projected to the occipital gyrus and cuneus. However, the  
72 electrodes commonly used to locate the motor cortex (C3 and C4), only projected to the  
73 precentral gyrus in an average of 13% of cases. These results demonstrated the variation in  
74 location of electrodes in the 10-20 layout when collated across all participants and encourage  
75 some caution when assuming consistency in the underlying cortex.

76 Koessler et al. (2009) recorded the normalised Talairach coordinates of electrodes  
77 positions projected onto the cortical surface using the 10-10 electrode layout (rather than the  
78 10-20) and therefore examined a greater number of electrodes than Okamoto et al. (2004).  
79 Across 16 participants, they reported a grand standard deviation of 4.6 mm in the  $x$  direction,  
80 7.1 mm in  $y$ , and 7.8 mm in  $z$ , with variation across projected cortical positions. Fp2 had the  
81 smallest global standard deviation of 67 mm<sup>3</sup> and P1 had the largest of 548 mm<sup>3</sup>. Some  
82 electrodes projected to the same region consistently (FP1, FP2, O1, and O2), whereas others  
83 had larger variance (C6 and FC6). For example, FP1, FP2, FC1, and FC2 projected onto the  
84 superior frontal gyrus in 100% of participants, and O1 and O2 always projected onto the  
85 occipital gyrus (BA 18: 81%, BA 19: 19%). In comparison, most central and parietal electrodes  
86 projected onto four different BA regions across participants; electrode P4 projected to BA 39  
87 (31%), 7 (25%), 40 (25%), 19 (19%), and electrode P8 projected to BA 19 (56%), 37 (19%),  
88 20 (12.5%), 39 (12.5%). Overall, variance in the underlying cortical regions was smallest for  
89 frontal and temporal electrodes, and greatest for central and parietal electrodes. This again  
90 suggests not only that positions vary across participants, but that the consistency of these  
91 positions is electrode and region dependent.

92 Whilst these results have important implications for making inferences from data  
93 derived from electrode positions, both Koessler et al. (2009) and Okamoto (2004) compared  
94 the location of manually positioned electrodes, without the aid of a cap with fixed locations.  
95 Therefore, errors in manual placement could have increased the variation in electrode location  
96 across participants. Atcherson et al. (2007) recorded the three-dimensional locations of 15  
97 electrodes fixed within a 72 channel Neuromedical Quick Cap. Despite the addition of an  
98 electrode cap, the electrode locations had standard deviations ranging from 3 mm to 12.7 mm  
99 in pre-auricular-nasion coordinates. In this case, the largest deviations occurred in M1 and M2,  
100 placed over the mastoids, as well as FPz (the most frontal central electrode) and Iz (the most  
101 posterior occipital electrode). The largest deviations therefore occurred in the electrodes around  
102 the edge of the cap, which could be explained by variations in participant skull shapes.

103 Overall, several studies have provided evidence against the assumption that a chosen  
104 electrode of interest will be proximally located to the same region of cortex across participants.  
105 This is perhaps not surprising, given the potential extent of between-subject variability in the  
106 size and arrangement of the cerebral cortex. However, consistent placement of EEG electrodes  
107 is often assumed when their location is used to inform other methods. For example, the 10-20  
108 and 10-10 electrode layouts are regularly used to guide transcranial magnetic stimulation

109 (TMS), where stimulation sites are chosen based on the position of specific electrodes such as  
110 those over the dorsolateral prefrontal cortex (Herwig et al., 2003). Structural or functional  
111 MRI-guided TMS stimulation is often considered to be a more reliable technique (Sack et al.,  
112 2009; de Witte et al., 2018), and a recent meta-analysis of rTMS studies identified that MRI-  
113 guided targets for stimulation were associated with increased disruptive effects of TMS  
114 (Beynel et al., 2019). However, in 2016 (the latest year included in the meta-analysis), only  
115 18% of studies used MR-guided TMS (Beynel et al., 2019). This constitutes a drop of 52%  
116 from studies between 2007 and 2013, suggesting a move back to older methods using EEG  
117 electrode guided targeting, and the need for a re-evaluation of the reliability of this method.

118 The aim of this study was to further understand the variability of EEG electrode  
119 positions in a commonly used research-grade EEG cap layout (BrainAmp MR, Brain Products  
120 GmbH, Gilching, Germany). We took advantage of a pre-existing neuroimaging dataset taken  
121 from a combined EEG and functional magnetic resonance imaging (fMRI) experiment, using  
122 64 channel fixed electrode caps from Brain Products with a 10-10 electrode layout (Scrivener  
123 at al., in press). Whilst several groups have developed methods to recover EEG electrode  
124 positions from simultaneous EEG-fMRI data using specific MRI acquisition methods (Butler  
125 et al., 2018) or reconstruction from acquired structural scans (Marino et al., 2016; Silva et al.,  
126 2016; de Munck et al., 2012; Whalen et al., 2008, Koessler et al., 2008; Jurcak et al., 2005;  
127 Lamm et al., 2001; Kozinska et al., 2001; Brinkmann et al., 1998), these approaches often  
128 require methods and toolboxes that are not yet widely used. As such, we additionally provide  
129 a novel and simple way of projecting electrode locations to the cortical surface using electrode  
130 gel artifacts (that appear on the MR image underlying electrode positions) and commercially  
131 available equipment. We also provide the code to reproduce our results, or to apply to separate  
132 data sets.

133 This method uses a stereotactic neuro-navigation system (Brainsight, Rogue Research  
134 Inc., Montreal, QC, Canada), that has built in function to project from the scalp to the  
135 underlying cortex. Electrode gel artifacts can be visualised using the scalp reconstruction  
136 function, facilitating localisation of the electrode positions on the skull of each participant.  
137 These locations can then be projected onto the cortical surface using the inbuilt functionality  
138 of Brainsight. Using this method, we report the standard deviation of electrode positions on the  
139 skull and on the cortical surface, as well as the variability of underlying brain regions. As far  
140 as we are aware, electrode gel artifacts have not yet been used to provide a comprehensive

141 assessment of EEG electrode position variability, either on the skull or the cortical surface,  
142 despite the fact they provide a simple method of localising brain regions under the cap.

## 143 **2. Materials and methods**

144 We used 20 structural scans collected for a previously reported EEG-fMRI experiment  
145 (Scrivener et al., in press), for which the data is available at <https://osf.io/w6bh3/>. The  
146 secondary data for the current article, as well as MATLAB scripts used to analyse the data, are  
147 freely available at <https://osf.io/853kw/>. Participants in the original study (Scrivener et al., in  
148 press) consented for their data to be shared anonymously, and only the defaced structural scans  
149 are freely available for download.

### 150 **2.1. Electrode Localisation**

151 Electrode positions were localised by author ATR using Brainsight 2.3.11 (Rogue  
152 Research Inc., Montreal, QC, Canada). The skin was reconstructed from the structural MRI  
153 scan to visualise electrode gel artifacts. Electrode positions were marked by placing targets  
154 onto the centre of the gel artifacts, orthogonal to the skin. If a gel artifact was not clearly visible,  
155 the location of the electrode was inferred based on the surrounding electrode positions (18  
156 across all participants, and never more than five in a single participant). The positions were  
157 independently checked by author CLS, and in cases of disagreement (nine electrodes across  
158 five participants) a consensus was met.

159 The electrode positions were then translated onto the underlying cortical surface. To do  
160 this we projected the targets to a curvilinear brain reconstruction (created using default  
161 parameters: slice spacing = 2mm, end depth = 16mm, peel depth = 0mm) using the ‘snap to’  
162 function. Target positions ( $xyz$ ) on the scalp and the curvilinear brain were exported as .txt files  
163 using the Brainsight review function.

### 164 **2.2. Data analysis**

165 The scalp and cortical locations for each participant were translated into MNI space,  
166 using the affine transformation matrix generated by the SPM12 normalise function. This matrix  
167 provides the transformation needed to move from subject space to MNI space and allows for  
168 comparison across subjects. To plot the scalp and cortical locations, we further translated the  
169 coordinates from MNI space into  $xyz$  using the origin of the MNI matrix. To assess the  
170 variability of electrode positions, we calculated the mean and standard deviation of its location  
171 across participants for each electrode. This was calculated separately for scalp and cortical

172 coordinates. Given that we had a recording of the cap size for most participants, we also  
173 extracted the locations separately for each cap size.

174 The brain regions at each electrode location were labelled using AtlasQuery in FSL and  
175 the Harvard-Oxford Cortical Atlas (Desikan et al., 2006; Frazier et al., 2005; Goldstein et al.,  
176 2007; Makris et al., 2006), allowing us to visualise the consistency of brain regions underlying  
177 each electrode. For each electrode in each participant, we took the highest probability region  
178 reported by the atlas. We then calculated the regions reported for each electrode across all  
179 participants as a percentage. If multiple brain regions were reported with the same (highest)  
180 probability in an electrode for a single participant, we excluded that participant for the  
181 calculation of that electrode's underlying region. We also excluded electrodes from calculation  
182 if the atlas was not able to generate a label. Percentages were calculated based on the number  
183 of usable participants for each electrode (mean  $\pm$  SD, participants =  $17 \pm 3$ ). We also used  
184 BioImage Suite (<https://bioimagesuiteweb.github.io/webapp/>) to locate the Brodmann area  
185 associated with the mean coordinates of each electrode, to supplement this information.

186 The scripts to reproduce these results are freely available at <https://osf.io/853kw/>, which  
187 can also be used on independent data. To do this, researchers should save their electrode  
188 locations into a .txt file per participant, and provide a matrix describing the transformation from  
189 subject space to MNI space (e.g., as provided by the SPM normalise function). The MATLAB  
190 script provided will extract the locations given in the .txt file, save them into a results structure,  
191 calculate summary statistics, save the results into a .csv file, and save a nifti file for each  
192 participant with the locations plotted in MNI space. An additional Bash script is provided to  
193 pass each electrode coordinate to AtlasQuery in FSL and save the output into a .txt file.

### 194 **3. Results**

#### 195 **3.1. Scalp locations**

196 The mean electrode locations across participants can be found in Table 1. Overall, we  
197 found a grand standard deviation of 3.94 mm in  $x$ , 5.55 mm in  $y$ , and 7.17 mm in  $z$ . The five  
198 electrodes with the smallest overall deviation (mean SD = 4.47 mm) in  $xyz$  were mostly in  
199 frontal and central locations (F5, F7, FC5, FCz, FT7). The five electrodes with the largest  
200 overall deviation (mean SD = 6.78 mm) were in parietal and occipital locations (O1, P3, PO3,  
201 PO4, POz). There was no visible relationship between cap size and electrode position  
202 variability (Table 2).

### 203 3.2. Cortex locations

204 The mean cortical locations across participants are displayed on an MNI template brain  
205 in Figure 1, and can also be found in Table 1. Overall, we found a grand standard deviation of  
206 3.95 mm in  $x$ , 5.09 mm in  $y$ , and 6.35 mm in  $z$ . The five electrodes with the smallest overall  
207 deviation (mean SD = 4.34 mm) in  $xyz$  were in frontal locations (F5, F7, FC5, FCz, FT7). The  
208 five electrodes with the largest overall deviation (mean SD = 6.25 mm) were in parietal and  
209 occipital areas (O1, Oz, PO3, PO4, FT10). There was no visible relationship between cap size  
210 and electrode position variability (Table 2). The cortical locations labelled using the Harvard-  
211 Oxford Cortical Atlas can be found in Table 3.

212

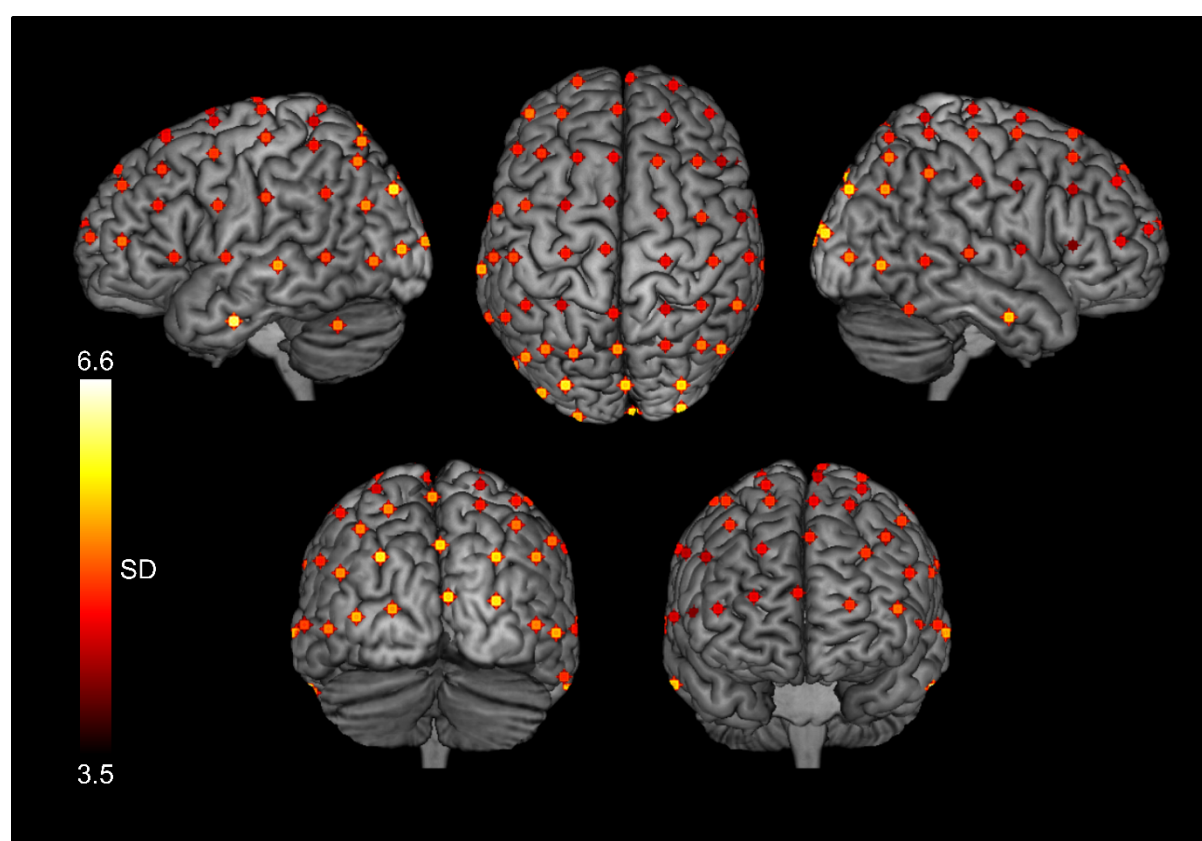

213

214 *Figure 1:* The average projected cortex locations for each of 64 electrodes across 20 subjects,  
215 displayed on an MNI template brain in MRICron. The standard deviation of each position is  
216 given by the colour, such that electrodes plotted in yellow had a higher standard deviation  
217 across subjects than those plotted in red. For visualisation purposes only, the mean co-ordinate  
218 for each electrode was convolved with a 4 mm sphere.

219



## 220 4. Discussion

221 We evaluated the variability of EEG electrode positions and their underlying brain  
222 regions using data recorded during a simultaneous EEG-fMRI experiment with Brain Products  
223 MR 64 channel caps. Overall, we found variance in electrode placement that was comparable  
224 with previous studies, with the largest deviations in the  $z$  dimension and in occipital and parietal  
225 electrodes. Consistent with previous findings, frontal electrodes had the smallest deviation  
226 across subjects, in co-ordinates both at the scalp and projected onto the brain (Okamoto et al.,  
227 2004; Koessler et al., 2009). However, we did not identify any greater variation specifically in  
228 electrodes around the edge of the electrode cap, as previously found (Atcherson et al., 2007).  
229 We also did not find any consistent effect of cap size. However, as most participants required  
230 the average cap size of 56, there were few data points from which to draw conclusions. In the  
231 future a more thorough examination of the influence of cap size on electrode position  
232 variability would be beneficial. In addition, we present a relatively simple method for  
233 approximating the location of electrodes using electrode gel artifacts, and provide the necessary  
234 analysis code for comparing scalp and cortex locations across subjects.

235 These results have particularly important implications for studies using TMS. It is  
236 generally proposed that MRI-guided stimulation is the most reliable approach to TMS (Sack et  
237 al., 2009; de Witte et al., 2018; Bergmann & Hartwigsen, 2020), and it is associated with  
238 increased disruptive effects (Beynel et al., 2019). However, it remains common practice to use  
239 the international 10-10 and 10-20 layout systems to guide positioning for TMS stimulation,  
240 particularly when neuro-navigation using structural or functional MRI scans is not possible  
241 (Beynel et al., 2019). This provides an approximate estimation of ROIs without the need for  
242 expensive MRI scanning time and will therefore be necessary for some experiments. Our  
243 results suggest that using EEG electrode position guided TMS may be more reliable for frontal  
244 electrodes, given the relatively small standard deviation found across participants. However,  
245 large variation in the electrode position and underlying brain regions were found for electrodes  
246 at the back of the head, including occipital and parietal ROIs, which may lead to larger  
247 between-subject differences in cortex stimulation with TMS.

248 Researchers also use the 10-20 layout to inform electrode choice in EEG analysis. In  
249 accordance with previous results (Okamoto et al., 2004), electrode pairs C1/C2 and C3/C4 were  
250 not reliable for approximating the location of the motor cortex across subjects. The mean  
251 locations of C3 and C4 were closer to the post-central gyrus, and while neighbouring electrode

252 C1 was proximally located to the motor cortex, its pair electrode C2 was closer to the pre-  
253 motor cortex. Similarly, the mean location of electrode PO7 was mapped to BA18, whereas  
254 PO8 was closer to BA19. In this case, it may be beneficial to select the most relevant electrodes  
255 on an individual participant basis to calculate power or evoked potentials arising from the  
256 primary visual cortex, rather than selecting PO7 and PO8 by default. Furthermore, source  
257 localisation of EEG data is frequently used to provide an estimate of where in the brain a given  
258 change in electrical potential arises. However, interpreting source localisation at the group level  
259 could be limited by the assumption that the relationship between electrode position and  
260 underlying cortical tissue is consistent across individuals (Dalal et al., 2014; Milan et al., 2018).  
261 Of course, electrical activity recorded at the level of the scalp is the summation of activity from  
262 multiple sources on the underlying cortex, and is not exclusively representing the neural  
263 activity in the closest region of the cortex (Nunez & Srinivasan, 2006). However, researchers  
264 generally select electrodes for analysis based on their proximity to the brain region of interest.

265 In addition to providing the results for one EEG-fMRI data set, we highlight a user-  
266 friendly way of using electrode gel artifacts to localise electrode positions across participants.  
267 This method takes advantage of existing functions in Brainsight; a software commonly used  
268 for neuro-navigation in TMS, and therefore accessible for many neuroimaging centres.  
269 Although it is time consuming to manually label the position of each electrode for each  
270 participant, researchers could instead label a subset of electrodes for analysis (if not all are  
271 used). In this case, electrode positions were labelled after completion of the experiment.  
272 However, researchers can use the functionality of Brainsight to mark the position of some/all  
273 electrodes on the EEG cap of each participant before beginning their experiment.

274 As this method requires manual marking of electrode positions on the reconstructed  
275 scalp of the participant, error can be introduced by the subjective decision of the researcher. To  
276 combat this, every electrode position was checked and agreed on by both authors. A total of  
277 nine electrodes across five participants were re-labelled during this checking procedure, all of  
278 which were more difficult to visualise given a very small or very large gel artifact. However,  
279 most positions were clearly visible on the Brainsight reconstruction, and the researchers agreed  
280 on the target locations of most electrodes. An additional source of variance could arise from  
281 the choice of atlas used for analysis. We used the Harvard-Oxford cortical atlas and Brodmann  
282 regions to label the cortex underlying each electrode. The choice of atlas will influence the  
283 exact labelling, and we therefore chose a commonly used atlas available in FSL. Other

284 researcher may choose to use atlases frequently used in their area of research, or those which  
 285 detail their specific region of interest.

286 Overall, our results emphasise the variation in electrode positioning that can be found  
 287 even using a fixed EEG cap, most likely caused by between-subject differences in brain  
 288 morphology. These results are likely to vary across experiment and participant group, however,  
 289 we provide an example case to demonstrate the potential variation in electrode positioning and  
 290 underlying cortex across a sample group. We present a relatively simple method for  
 291 approximating the location of electrodes in a simultaneous EEG-fMRI dataset with  
 292 accompanying analysis code, and suggest that researchers check the regions underlying their  
 293 EEG ROIs to improve the generalisability and reliability of their results.

294

295 *Table 1: Mean and standard deviation of the xyz MNI locations for each electrode, presented*  
 296 *separately at the scalp and on the cortex.*

| Electrode | Mean (SD)     |               |              |               |               |              |
|-----------|---------------|---------------|--------------|---------------|---------------|--------------|
|           | Scalp         |               |              | Cortex        |               |              |
|           | x             | y             | z            | x             | y             | z            |
| AF3       | -31.55 (4.56) | 65.1 (4.78)   | 44.6 (5.99)  | -25.41 (3.99) | 54.96 (4.57)  | 36.6 (5.37)  |
| AF4       | 34.61 (4.76)  | 65.6 (4.94)   | 42.92 (7.92) | 28.06 (4.42)  | 55.43 (4.28)  | 35.32 (6.42) |
| AF7       | -53.89 (3.69) | 59.55 (4.31)  | 8.52 (6.68)  | -45.43 (4.04) | 52.57 (3.71)  | 7.20 (6.01)  |
| AF8       | 55.41 (4.14)  | 59.76 (4.68)  | 10.20 (8.88) | 46.40 (3.81)  | 52.38 (4.23)  | 8.78 (8.23)  |
| AFZ       | 0.50 (4.55)   | 70.36 (4.65)  | 50.59 (7.57) | 0.63 (3.84)   | 57.98 (4.52)  | 41.08 (6.31) |
| C1        | -31.55 (4.94) | -21.59 (7.43) | 92.04 (3.41) | -25.56 (4.77) | -23.82 (6.77) | 75.26 (2.61) |
| C2        | 28.95 (5.68)  | -21.98 (7.47) | 94.55 (3.36) | 23.84 (4.52)  | -24.31 (6.80) | 78.00 (3.21) |
| C3        | -59.99 (4.12) | -19.25 (7.40) | 70.68 (4.65) | -50.88 (4.53) | -21.18 (6.81) | 59.95 (3.47) |
| C4        | 58.97 (4.73)  | -21.28 (6.98) | 73.84 (5.65) | 50.78 (4.61)  | -23.18 (6.17) | 63.58 (4.78) |
| C5        | -76.99 (2.19) | -19.50 (6.26) | 37.19 (5.91) | -66.15 (3.20) | -20.58 (5.71) | 33.83 (5.35) |
| C6        | 77.83 (2.15)  | -21.23 (5.94) | 39.99 (8.02) | 66.48 (3.11)  | -21.77 (5.42) | 36.16 (6.97) |
| CP1       | -32.35 (5.32) | -51.50 (7.52) | 89.76 (3.69) | -25.64 (4.41) | -48.14 (5.73) | 71.46 (3.43) |
| CP2       | 29.61 (4.72)  | -52.43 (7.98) | 92.91 (3.01) | 24.46 (3.97)  | -49.71 (6.28) | 75.38 (3.28) |
| CP3       | -59.90 (4.74) | -49.84 (7.27) | 69.31 (5.29) | -49.15 (4.81) | -47.78 (5.87) | 58.42 (3.80) |
| CP4       | 56.54 (4.27)  | -51.89 (7.07) | 73.89 (5.87) | 46.66 (4.34)  | -48.71 (5.69) | 62.98 (4.35) |
| CP5       | -74.32 (2.58) | -49.33 (6.09) | 37.02 (8.16) | -63.88 (3.49) | -47.19 (5.69) | 33.95 (7.01) |
| CP6       | 73.44 (2.21)  | -52.25 (5.56) | 41.24 (7.95) | 62.43 (3.13)  | -49.07 (4.98) | 37.65 (6.65) |
| CPZ       | -1.60 (4.97)  | -53.38 (7.80) | 96.60 (2.90) | -0.73 (4.32)  | -50.47 (6.59) | 75.85 (3.31) |
| CZ        | -1.09 (4.43)  | -22.15 (7.70) | 99.93 (2.66) | -0.47 (3.61)  | -24.64 (6.88) | 80.16 (3.89) |
| F1        | -25.78 (4.61) | 39.37 (6.27)  | 72.50 (4.61) | -20.48 (4.35) | 32.36 (5.57)  | 59.68 (5.07) |
| F2        | 26.17 (4.41)  | 39.90 (6.01)  | 73.75 (5.62) | 20.96 (3.78)  | 32.86 (5.37)  | 59.93 (5.04) |
| F3        | -46.04 (3.84) | 40.62 (6.37)  | 55.73 (5.58) | -38.23 (3.74) | 34.47 (5.99)  | 46.92 (5.14) |

|      |               |                |                |               |                |               |
|------|---------------|----------------|----------------|---------------|----------------|---------------|
| F4   | 46.51 (4.77)  | 41.51 (5.70)   | 57.56 (7.15)   | 38.59 (4.31)  | 34.99 (5.03)   | 48.23 (5.93)  |
| F5   | -59.99 (2.80) | 40.30 (4.91)   | 33.12 (6.10)   | -50.82 (3.08) | 35.00 (4.51)   | 28.66 (5.50)  |
| F6   | 62.13 (3.71)  | 39.34 (5.05)   | 34.98 (7.61)   | 52.34 (3.67)  | 33.9 (4.35)    | 30.57 (6.51)  |
| F7   | -68.45 (2.60) | 35.32 (4.52)   | 4.68 (5.56)    | -56.68 (2.82) | 30.5 (4.28)    | 4.33 (5.10)   |
| F8   | 71.6 (3.03)   | 32.35 (5.26)   | 6.88 (8.00)    | 59.39 (3.04)  | 27.37 (4.67)   | 6.97 (6.98)   |
| FC1  | -29.94 (4.43) | 10.07 (7.18)   | 84.65 (4.01)   | -24.69 (4.32) | 5.73 (6.43)    | 71.11 (3.45)  |
| FC2  | 28.88 (4.51)  | 9.22 (6.47)    | 86.09 (4.06)   | 24.09 (4.01)  | 5.40 (6.14)    | 72.18 (3.55)  |
| FC3  | -53.84 (3.95) | 10.76 (6.85)   | 65.67 (5.19)   | -46.09 (4.07) | 7.35 (6.76)    | 56.46 (4.20)  |
| FC4  | 54.9 (4.41)   | 10.08 (5.90)   | 67.56 (5.81)   | 47.52 (4.25)  | 6.49 (5.70)    | 58.34 (5.18)  |
| FC5  | -71.6 (2.29)  | 11.83 (5.91)   | 34.94 (5.11)   | -61.1 (2.74)  | 8.02 (5.28)    | 30.64 (5.07)  |
| FC6  | 73.25 (3.46)  | 9.72 (4.52)    | 38.28 (8.03)   | 62.59 (3.44)  | 6.62 (4.52)    | 33.69 (7.09)  |
| FCZ  | 0.02 (3.73)   | 11.38 (6.8)    | 91.62 (3.31)   | 0.41 (3.01)   | 6.77 (6.27)    | 75.19 (4.06)  |
| FP1  | -29.72 (5.00) | 77.81 (2.42)   | 13.85 (7.37)   | -24.54 (4.48) | 66.41 (2.57)   | 11.97 (6.81)  |
| FP2  | 29.87 (5.19)  | 78.59 (3.18)   | 14.59 (9.50)   | 25.25 (4.43)  | 66.62 (2.86)   | 12.19 (7.77)  |
| FPZ  | -0.36 (5.19)  | 83.18 (2.18)   | 16.67 (8.54)   | -0.29 (4.56)  | 69.71 (2.39)   | 13.71 (7.35)  |
| FT10 | 78.78 (1.80)  | 0.51 (5.48)    | -32.1 (8.41)   | 60.47 (5.25)  | -1.67 (5.63)   | -31.19 (8.88) |
| FT7  | -77.03 (2.10) | 8.63 (5.19)    | 2.98 (6.14)    | -63.49 (3.62) | 5.75 (4.43)    | 3.02 (5.36)   |
| FT8  | 79.96 (1.76)  | 5.11 (4.37)    | 5.06 (8.60)    | 66.54 (2.85)  | 2.58 (3.83)    | 4.93 (8.12)   |
| FT9  | -77.33 (2.65) | 1.91 (5.8)     | -31.28 (6.38)  | -59.09 (6.18) | 0.07 (5.75)    | -30.94 (5.82) |
| FZ   | 0.52 (4.56)   | 43.05 (6.34)   | 77.99 (5.14)   | 0.88 (3.46)   | 34.43 (5.64)   | 62.21 (4.84)  |
| O1   | -31.42 (5.64) | -109.90 (3.25) | 8.94 (11.50)   | -27.11 (4.68) | -99.78 (3.60)  | 6.68 (10.44)  |
| O2   | 26.35 (4.88)  | -110.54 (2.94) | 11.57 (11.31)  | 22.51 (4.30)  | -100.07 (2.74) | 8.94 (10.18)  |
| OZ   | -2.53 (5.50)  | -114.61 (2.37) | 11.90 (11.48)  | -2.49 (4.97)  | -102.67 (3.09) | 9.10 (10.31)  |
| P1   | -31.55 (5.73) | -77.61 (6.82)  | 75.8 (6.59)    | -25.9 (4.45)  | -68.45 (5.63)  | 61.21 (4.51)  |
| P2   | 24.99 (5.99)  | -78.59 (6.65)  | 77.65 (6.53)   | 20.8 (5.18)   | -69.28 (6.73)  | 64.82 (4.87)  |
| P3   | -52.00 (5.32) | -77.05 (6.86)  | 58.59 (8.51)   | -42.75 (4.45) | -69.51 (6.00)  | 49.82 (5.89)  |
| P4   | 47.39 (4.70)  | -78.76 (6.04)  | 61.12 (7.89)   | 39.28 (4.64)  | -70.63 (5.65)  | 52.38 (6.17)  |
| P5   | -63.26 (3.79) | -77.35 (5.62)  | 30.97 (9.72)   | -53.84 (3.61) | -71.50 (5.22)  | 28.15 (8.21)  |
| P6   | 60.40 (3.56)  | -78.77 (5.00)  | 36.36 (9.56)   | 51.14 (3.76)  | -71.81 (4.69)  | 32.06 (8.35)  |
| P7   | -69.63 (3.32) | -73.74 (4.90)  | 0.78 (10.60)   | -59.17 (2.82) | -69.14 (4.46)  | 0.70 (10.07)  |
| P8   | 67.72 (2.35)  | -75.60 (4.69)  | 5.83 (9.92)    | 57.52 (2.74)  | -70.05 (4.18)  | 4.98 (9.43)   |
| PO3  | -34.84 (5.56) | -98.67 (5.19)  | 41.77 (9.39)   | -29.71 (4.39) | -88.53 (5.70)  | 35.13 (8.07)  |
| PO4  | 29.24 (5.60)  | -98.85 (4.95)  | 45.00 (9.87)   | 25.37 (4.62)  | -88.73 (5.24)  | 38.16 (8.93)  |
| PO7  | -54.12 (4.43) | -93.91 (3.75)  | 4.79 (10.26)   | -46.45 (3.26) | -86.74 (3.80)  | 3.87 (9.43)   |
| PO8  | 50.17 (3.84)  | -95.92 (4.15)  | 8.99 (10.35)   | 42.78 (4.03)  | -88.05 (3.60)  | 7.87 (9.83)   |
| POZ  | -3.28 (5.69)  | -101.06 (5.15) | 50.6 (9.14)    | -2.76 (4.79)  | -90.20 (5.71)  | 42.12 (7.54)  |
| PZ   | -2.25 (6.16)  | -80.03 (7.27)  | 79.64 (6.14)   | -1.94 (5.31)  | -69.12 (7.17)  | 66.04 (4.54)  |
| T7   | -81.12 (1.60) | -20.17 (5.89)  | 0.58 (7.98)    | -69.72 (2.66) | -20.31 (5.20)  | 0.55 (7.35)   |
| T8   | 83.15 (1.08)  | -23.69 (6.09)  | 4.20 (9.23)    | 71.04 (2.95)  | -23.53 (5.69)  | 3.60 (8.61)   |
| TP7  | -78.17 (1.68) | -49.26 (4.7)   | 0.60 (9.15)    | -68.19 (2.19) | -47.06 (4.03)  | 0.35 (8.25)   |
| TP8  | 78.51 (1.70)  | -52.05 (5.25)  | 3.53 (8.75)    | 67.73 (2.45)  | -48.93 (5.09)  | 2.77 (7.97)   |
| TP9  | -73.37 (2.16) | -54.91 (4.44)  | -35.64 (8.25)  | -57.93 (4.26) | -52.6 (3.11)   | -33.16 (7.65) |
| TP10 | 73.87 (2.55)  | -57.04 (4.38)  | -33.84 (10.41) | 58.93 (3.95)  | -53.09 (3.59)  | -31.33 (9.05) |

298 *Table 2: Average standard deviation of the xyz MNI locations at the scalp and cortex presented*  
 299 *separately for each cap size. Note that most participants had cap size 56, and therefore the*  
 300 *distribution is unequal. The cap size for one participant was not recorded.*

| Cap size (cm) | n  | Scalp |      |      | Cortex |      |      |
|---------------|----|-------|------|------|--------|------|------|
|               |    | x     | y    | z    | x      | y    | z    |
| 54            | 4  | 3.89  | 3.05 | 6.21 | 3.42   | 2.85 | 5.43 |
| 56            | 12 | 4.26  | 5.54 | 7.80 | 4.26   | 5.54 | 7.00 |
| 58            | 3  | 2.42  | 5.66 | 6.02 | 3.04   | 5.12 | 5.22 |
| All           | 20 | 3.94  | 5.55 | 7.17 | 3.95   | 5.09 | 6.35 |

301

302 *Table 3: Average electrode locations on the scalp labelled using AtlasLabel in FSL and the*  
 303 *Harvard-Oxford Cortical Structural atlas. For each electrode we calculated the percentage of*  
 304 *participants with each anatomical label ascribed. The closest Brodmann area for the most*  
 305 *common cortical structure at each electrode projection is also detailed. ANG: angular gyrus,*  
 306 *IFG: inferior frontal gyrus, ITG: inferior temporal gyrus, JLC: juxtapositional lobule cortex*  
 307 *(formerly supplementary motor cortex), LOC: lateral occipital cortex, MFG: middle frontal*  
 308 *gyrus, MTG: middle temporal gyrus, SFG: superior frontal gyrus, SMG: supramarginal gyrus,*  
 309 *SPL: superior parietal lobule, STG: superior temporal gyrus*

| Electrode | Percentage underlying brain regions                                                                         | Brodmann area nearest mean electrode position |
|-----------|-------------------------------------------------------------------------------------------------------------|-----------------------------------------------|
| AF3       | frontal pole (100%)                                                                                         | Left BA9                                      |
| AF4       | frontal pole (100%)                                                                                         | Right BA9                                     |
| AF7       | frontal pole (100%)                                                                                         | Left BA10                                     |
| AF8       | frontal pole (100%)                                                                                         | Right BA10                                    |
| AFZ       | frontal pole (62.5%), SFG (37.5%)                                                                           | Left BA9                                      |
| C1        | precentral gyrus (71%), postcentral gyrus (29%)                                                             | Left BA4                                      |
| C2        | precentral gyrus (87.5%), postcentral gyrus (12.5%)                                                         | Right BA6                                     |
| C3        | postcentral gyrus (87.5%), precentral gyrus (12.5%)                                                         | Left BA1                                      |
| C4        | postcentral gyrus (85%), precentral gyrus (15%)                                                             | Right BA1                                     |
| C5        | postcentral gyrus (50%), anterior SMG (44.4%), precentral gyrus (5.6%)                                      | Left BA40                                     |
| C6        | anterior SMG (72%), postcentral gyrus (28%)                                                                 | Right BA40                                    |
| CP1       | SPL (66.67%), postcentral gyrus (27.78%), superior LOC (5.56%)                                              | Left BA7                                      |
| CP2       | SPL (80%), postcentral gyrus (13%), superior LOC (7%)                                                       | Right BA7                                     |
| CP3       | posterior SMG (47%), SPL (27%), ANG (13%), postcentral gyrus (13%)                                          | Left BA40                                     |
| CP4       | ANG (50%), SPL (42%), postcentral gyrus (8%)                                                                | Right BA7                                     |
| CP5       | posterior SMG (61.11%), anterior SMG (16.67%), ANG (11.11%),<br>posterior STG (5.56%), superior LOC (5.56%) | Left BA39                                     |
| CP6       | ANG (53%), posterior SMG (40%), superior LOC (7%)                                                           | Right BA39                                    |
| CPZ       | postcentral gyrus (62.5%), precuneous cortex (18.75%), SPL (12.5%),<br>superior LOC (6.25%)                 | Left BA7                                      |

|      |                                                                                                                                |               |
|------|--------------------------------------------------------------------------------------------------------------------------------|---------------|
| CZ   | precentral gyrus (87%), postcentral gyrus (13%)                                                                                | Right BA4     |
| F1   | SFG (71%), frontal pole (29%)                                                                                                  | Left BA6/BA8  |
| F2   | SFG (77%), frontal pole (23%)                                                                                                  | Right BA6/BA8 |
| F3   | MFG (64%), frontal pole (36%)                                                                                                  | Left BA9      |
| F4   | frontal pole (53%), MFG (47%)                                                                                                  | Right BA9     |
| F5   | MFG (65%), frontal pole (35%)                                                                                                  | Left BA9      |
| F6   | MFG (50%), frontal pole (50%)                                                                                                  | Right BA9     |
| F7   | IFG (pars triangularis) (83%), frontal pole (11%), IFG (pars opercularis) (6%)                                                 | Left BA45     |
| F8   | IFG (pars triangularis) (66.67%), IFG (pars opercularis) (16.67%), MFG (5.56%), precentral gyrus (5.56%), frontal pole (5.56%) | Right BA45    |
| FC1  | SFG (93.75%), MFG (6.25%)                                                                                                      | Left BA6      |
| FC2  | SFG (82%), precentral gyrus (18%)                                                                                              | Right BA6     |
| FC3  | MFG (89%), precentral gyrus (11%)                                                                                              | Left BA6      |
| FC4  | MFG (92%), precentral gyrus (8%)                                                                                               | Right BA6     |
| FC5  | precentral gyrus (88%), MFG (6%), IFG (pars opercularis) (6%)                                                                  | Left BA6      |
| FC6  | precentral gyrus (81%), postcentral gyrus (13%), MFG (6%)                                                                      | Right BA6     |
| FCZ  | JLC (66.7%), SFG (33.3%)                                                                                                       | Left BA6      |
| FP1  | frontal pole (100%)                                                                                                            | Left BA10     |
| FP2  | frontal pole (100%)                                                                                                            | Right BA10    |
| FPZ  | frontal pole (100%)                                                                                                            | Left BA10     |
| FT10 | anterior MTG (66.7%), posterior ITG (11.1%), temporal pole (11.1%), posterior MTG (5.6%), anterior ITG (5.6%)                  | Right BA21    |
| FT7  | precentral gyrus (64.29%), temporal pole (14.29%), anterior STG (14.29%), IFG (pars opercularis) (7.14%)                       | Left BA44     |
| FT8  | precentral gyrus (62.5%), anterior STG (25%), central opercular cortex (6.25%), posterior MTG (6.25%)                          | Right BA6     |
| FT9  | anterior MTG (42%), temporal pole (37%), posterior MTG (16%), anterior ITG (5%)                                                | Left BA38     |
| FZ   | SFG (100%)                                                                                                                     | Left BA6      |
| O1   | occipital pole (100%)                                                                                                          | Left BA18     |
| O2   | occipital pole (100%)                                                                                                          | Right BA18    |
| OZ   | occipital pole (100%)                                                                                                          | Left BA18     |
| P1   | superior LOC (95%), SPL (5%)                                                                                                   | Left BA7      |
| P2   | superior LOC (100%)                                                                                                            | Right BA7     |
| P3   | superior LOC (95%), ANG (5%)                                                                                                   | Left BA39     |
| P4   | superior LOC (100%)                                                                                                            | Right BA39    |
| P5   | superior LOC (89.47%), inferior LOC (5.26%), ANG (5.26%)                                                                       | Left BA39     |
| P6   | superior LOC (100%)                                                                                                            | Right BA39    |
| P7   | inferior LOC (75%), superior LOC (20%), MTG (temporooccipital part) (5%)                                                       | Left BA19     |
| P8   | inferior LOC (85%), superior LOC (10%), ANG (5%)                                                                               | Right BA19    |
| PO3  | superior LOC (65%), occipital pole (35%)                                                                                       | Left BA19     |
| PO4  | occipital pole (58%), superior LOC (42%)                                                                                       | Right BA19    |
| PO7  | inferior LOC (80%), superior LOC (15%), occipital pole (5%)                                                                    | Left BA18     |
| PO8  | occipital pole (33.33%), superior LOC (33.33%), inferior LOC (33.33%)                                                          | Right BA19    |

|      |                                                                                                                                |                             |
|------|--------------------------------------------------------------------------------------------------------------------------------|-----------------------------|
| POZ  | cuneal cortex (37.5%), occipital pole (31.3%), superior LOC (25%),<br>precuneous cortex (6.3%)                                 | Left BA19                   |
| PZ   | precuneous cortex (60%), superior LOC (33.33%), SPL (6.66%)                                                                    | Left BA7                    |
| T7   | posterior STG (72.2%), posterior MTG (16.6%), anterior STG (5.6%),<br>anterior SMG (5.6%)                                      | Left BA21                   |
| T8   | posterior STG (52.9%), posterior MTG (29.4%), planum temporale<br>(5.9%), anterior SMG (5.9%), central opercular cortex (5.9%) | Right BA22                  |
| TP7  | MTG (temporooccipital part) (73.7%), posterior SMG (15.8%), posterior<br>MTG (10.5%)                                           | Left BA21                   |
| TP8  | MTG (temporooccipital part) (75%), ANG (20%), posterior SMG (5%)                                                               | Right BA37                  |
| TP9  | ITG (temporooccipital part) (100%)                                                                                             | Not applicable (cerebellum) |
| TP10 | ITG (temporooccipital part) (89%), MTG (temporooccipital part) (11%)                                                           | Not applicable (cerebellum) |

311 **References**

- 312 Atcherson, S. R., Gould, H. J., Pousson, M. A., & Prout, T. M. (2007). Variability of  
313 Electrode Positions Using Electrode Caps. *Brain Topography*, *20*(2), 105–111.  
314 <https://doi.org/10.1007/s10548-007-0036-z>
- 315 Beynel, L., Appelbaum, L. G., Luber, B., Crowell, C. A., Hilbig, S. A., Lim, W., Nguyen, D.,  
316 Chrapliwy, N. A., Davis, S. W., Cabeza, R., Lisanby, S. H., & Deng, Z.-D. (2019).  
317 Effects of online repetitive transcranial magnetic stimulation (rTMS) on cognitive  
318 processing: A meta-analysis and recommendations for future studies. *Neuroscience &*  
319 *Biobehavioral Reviews*, *107*, 47–58. <https://doi.org/10.1016/j.neubiorev.2019.08.018>
- 320 Brinkmann, B. H., O'Brien, T. J., Dresner, M. A., Lagerlund, T. D., Sharbrough, F. W., &  
321 Robb, R. A. (1998). Scalp-Recorded EEG Localization in MRI Volume Data. *Brain*  
322 *Topography*, *10*(4), 245–253. <https://doi.org/10.1023/A:1022266822252>
- 323 Butler, R., Gilbert, G., Descoteaux, M., Bernier, P.-M., & Whittingstall, K. (2017).  
324 Application of polymer sensitive MRI sequence to localization of EEG electrodes.  
325 *Journal of Neuroscience Methods*, *278*, 36–45.  
326 <https://doi.org/10.1016/j.jneumeth.2016.12.013>
- 327 Dalal, S. S., Rampp, S., Willomitzer, F., & Ettl, S. (2014). Consequences of EEG electrode  
328 position error on ultimate beamformer source reconstruction performance. *Frontiers*  
329 *in Neuroscience*, *8*. <https://doi.org/10.3389/fnins.2014.00042>
- 330 de Munck, J. C., van Houdt, P. J., Verdaasdonk, R. M., & Ossenblok, P. P. W. (2012). A  
331 semi-automatic method to determine electrode positions and labels from gel artifacts  
332 in EEG/fMRI-studies. *NeuroImage*, *59*(1), 399–403.  
333 <https://doi.org/10.1016/j.neuroimage.2011.07.021>
- 334 De Witte, S., Klooster, D., Dedoncker, J., Duprat, R., Remue, J., & Baeken, C. (2018). Left  
335 prefrontal neuronavigated electrode localization in tDCS: 10–20 EEG system versus



- 336 MRI-guided neuronavigation. *Psychiatry Research: Neuroimaging*, 274, 1–6.
- 337 <https://doi.org/10.1016/j.psychresns.2018.02.001>
- 338 Desikan, R. S., Ségonne, F., Fischl, B., Quinn, B. T., Dickerson, B. C., Blacker, D., Buckner,  
339 R. L., Dale, A. M., Maguire, R. P., Hyman, B. T., Albert, M. S., & Killiany, R. J.  
340 (2006). An automated labeling system for subdividing the human cerebral cortex on  
341 MRI scans into gyral based regions of interest. *NeuroImage*, 31(3), 968–980.  
342 <https://doi.org/10.1016/j.neuroimage.2006.01.021>
- 343 Frazier, J. A., Chiu, S., Breeze, J. L., Makris, N., Lange, N., Kennedy, D. N., Herbert, M. R.,  
344 Bent, E. K., Koneru, V. K., Dieterich, M. E., Hodge, S. M., Rauch, S. L., Grant, P. E.,  
345 Cohen, B. M., Seidman, L. J., Caviness, V. S., & Biederman, J. (2005). Structural  
346 Brain Magnetic Resonance Imaging of Limbic and Thalamic Volumes in Pediatric  
347 Bipolar Disorder. *American Journal of Psychiatry*, 162(7), 1256–1265.  
348 <https://doi.org/10.1176/appi.ajp.162.7.1256>
- 349 Goldstein, J. M., Seidman, L. J., Makris, N., Ahern, T., O'Brien, L. M., Caviness, V. S.,  
350 Kennedy, D. N., Faraone, S. V., & Tsuang, M. T. (2007). Hypothalamic  
351 Abnormalities in Schizophrenia: Sex Effects and Genetic Vulnerability. *Biological*  
352 *Psychiatry*, 61(8), 935–945. <https://doi.org/10.1016/j.biopsych.2006.06.027>
- 353 Herwig, U., Satrapi, P., & Schönfeldt-Lecuona, C. (2003). Using the International 10-20 EEG  
354 System for Positioning of Transcranial Magnetic Stimulation. *Brain Topography*,  
355 16(2), 95–99. <https://doi.org/10.1023/B:BRAT.0000006333.93597.9d>
- 356 Khosla, D., Don, M., & Kwong, B. (1999). Spatial mislocalization of EEG electrodes –  
357 effects on accuracy of dipole estimation. *Clinical Neurophysiology*, 110(2), 261–271.  
358 [https://doi.org/10.1016/S0013-4694\(98\)00121-7](https://doi.org/10.1016/S0013-4694(98)00121-7)
- 359 Koessler, L., Benhadid, A., Maillard, L., Vignal, J. P., Felblinger, J., Vespignani, H., &  
360 Braun, M. (2008). Automatic localization and labeling of EEG sensors (ALLES) in

- 361 MRI volume. *NeuroImage*, *41*(3), 914–923.
- 362 <https://doi.org/10.1016/j.neuroimage.2008.02.039>
- 363 Koessler, L., Maillard, L., Benhadid, A., Vignal, J. P., Felblinger, J., Vespignani, H., &  
364 Braun, M. (2009). Automated cortical projection of EEG sensors: Anatomical  
365 correlation via the international 10–10 system. *NeuroImage*, *46*(1), 64–72.  
366 <https://doi.org/10.1016/j.neuroimage.2009.02.006>
- 367 Lamm, C., Windischberger, C., Leodolter, U., Moser, E., & Bauer, H. (2001). Co-  
368 Registration of EEG and MRI Data Using Matching of Spline Interpolated and MRI-  
369 Segmented Reconstructions of the Scalp Surface. *Brain Topography*, *14*(2), 93–100.  
370 <https://doi.org/10.1023/A:1012988728672>
- 371 Makris, N., Goldstein, J. M., Kennedy, D., Hodge, S. M., Caviness, V. S., Faraone, S. V.,  
372 Tsuang, M. T., & Seidman, L. J. (2006). Decreased volume of left and total anterior  
373 insular lobule in schizophrenia. *Schizophrenia Research*, *83*(2), 155–171.  
374 <https://doi.org/10.1016/j.schres.2005.11.020>
- 375 Marino, M., Liu, Q., Brem, S., Wenderoth, N., & Mantini, D. (2016). Automated detection  
376 and labeling of high-density EEG electrodes from structural MR images. *Journal of*  
377 *Neural Engineering*, *13*(5), 056003. <https://doi.org/10.1088/1741-2560/13/5/056003>
- 378 Nunez, P. L., & Srinivasan, R. (2006). *Electric Fields of the Brain: The Neurophysics of*  
379 *EEG*. Oxford University Press.
- 380 Okamoto, M., Dan, H., Sakamoto, K., Takeo, K., Shimizu, K., Kohno, S., Oda, I., Isobe, S.,  
381 Suzuki, T., Kohyama, K., & Dan, I. (2004). Three-dimensional probabilistic  
382 anatomical cranio-cerebral correlation via the international 10–20 system oriented for  
383 transcranial functional brain mapping. *NeuroImage*, *21*(1), 99–111.  
384 <https://doi.org/10.1016/j.neuroimage.2003.08.026>

- 385 Oostenveld, R., & Praamstra, P. (2001). The five percent electrode system for high-resolution  
386 EEG and ERP measurements. *Clinical Neurophysiology*, *112*(4), 713–719.  
387 [https://doi.org/10.1016/S1388-2457\(00\)00527-7](https://doi.org/10.1016/S1388-2457(00)00527-7)
- 388 Sack, A. T., Cohen Kadosh, R., Schuhmann, T., Moerel, M., Walsh, V., & Goebel, R. (2009).  
389 Optimizing Functional Accuracy of TMS in Cognitive Studies: A Comparison of  
390 Methods. *Journal of Cognitive Neuroscience*, *21*(2), 207–221.  
391 <https://doi.org/10.1162/jocn.2009.21126>
- 392 Scrivener, C. L., Malik, A., Lindner, M., & Roesch, E. B. (2020). *Sensing and seeing*  
393 *associated with overlapping occipitoparietal activation in simultaneous EEG-fMRI*.  
394 <https://doi.org/10.1101/2020.07.08.193326>
- 395 Taberna, G. A., Marino, M., Ganzetti, M., & Mantini, D. (2019). Spatial localization of EEG  
396 electrodes using 3D scanning. *Journal of Neural Engineering*, *16*(2), 026020.  
397 <https://doi.org/10.1088/1741-2552/aafdd1>
- 398 Whalen, C., Maclin, E. L., Fabiani, M., & Gratton, G. (2008). Validation of a method for  
399 coregistering scalp recording locations with 3D structural MR images. *Human Brain*  
400 *Mapping*, *29*(11), 1288–1301. <https://doi.org/10.1002/hbm.20465>  
401
